# Supplementary material
Source: Springer Nature journal article supplement (https://www.springermedizin.de/resource/supplementary/13005_2009_154_MOESM5_ESM.pdf/9626374)

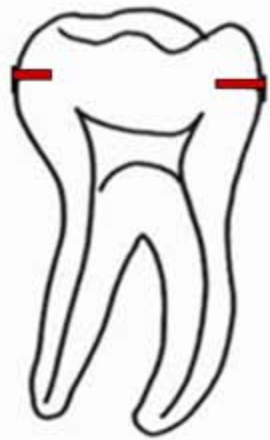

**a**

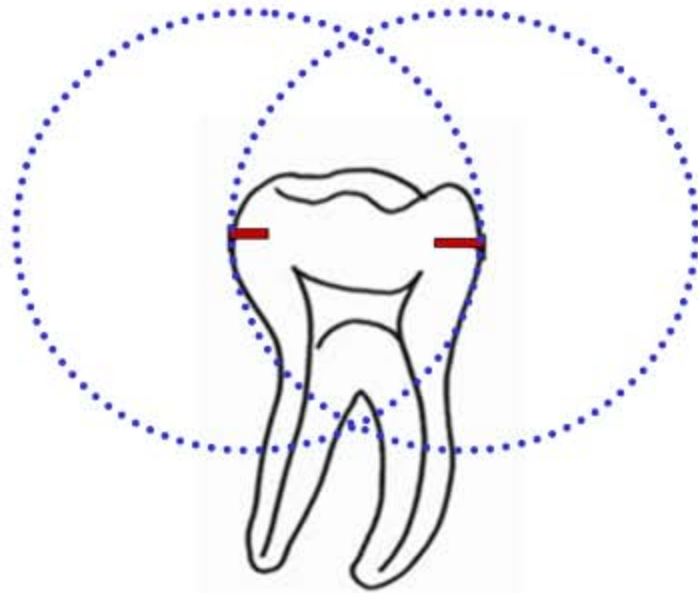

**b**

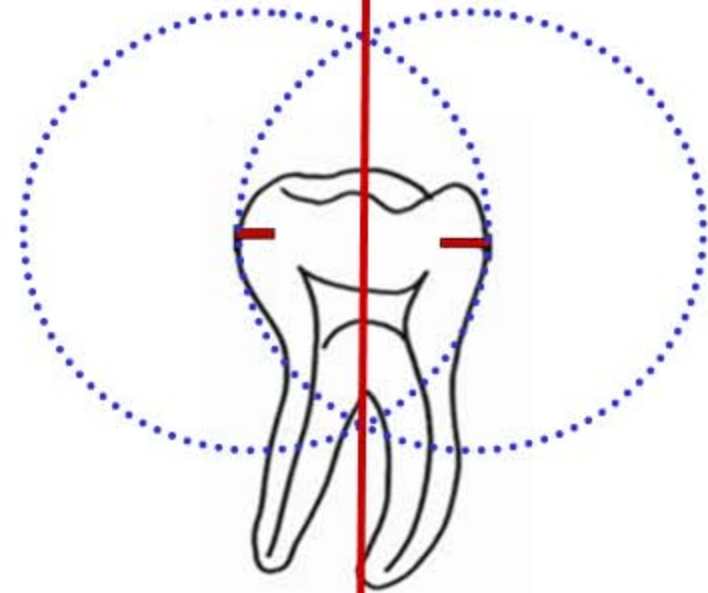

**c**

Supplement: MOESM5 [file 9626374]
